# Supplementary material
Source: PubMed Central journal article supplement (PMC8817625)
Supplement: NIHMS1760991-supplement-Supp_Materials.pdf [file NIHMS1760991-supplement-Supp_Materials.pdf]

**Supplement Figure S1 and Table S1:**

**Figure S1. Trends in age-adjusted incidence rates (number of breast cancer cases per 100,000 population) in women in SEER areas from 2010 to 2018 by race/ethnicity**

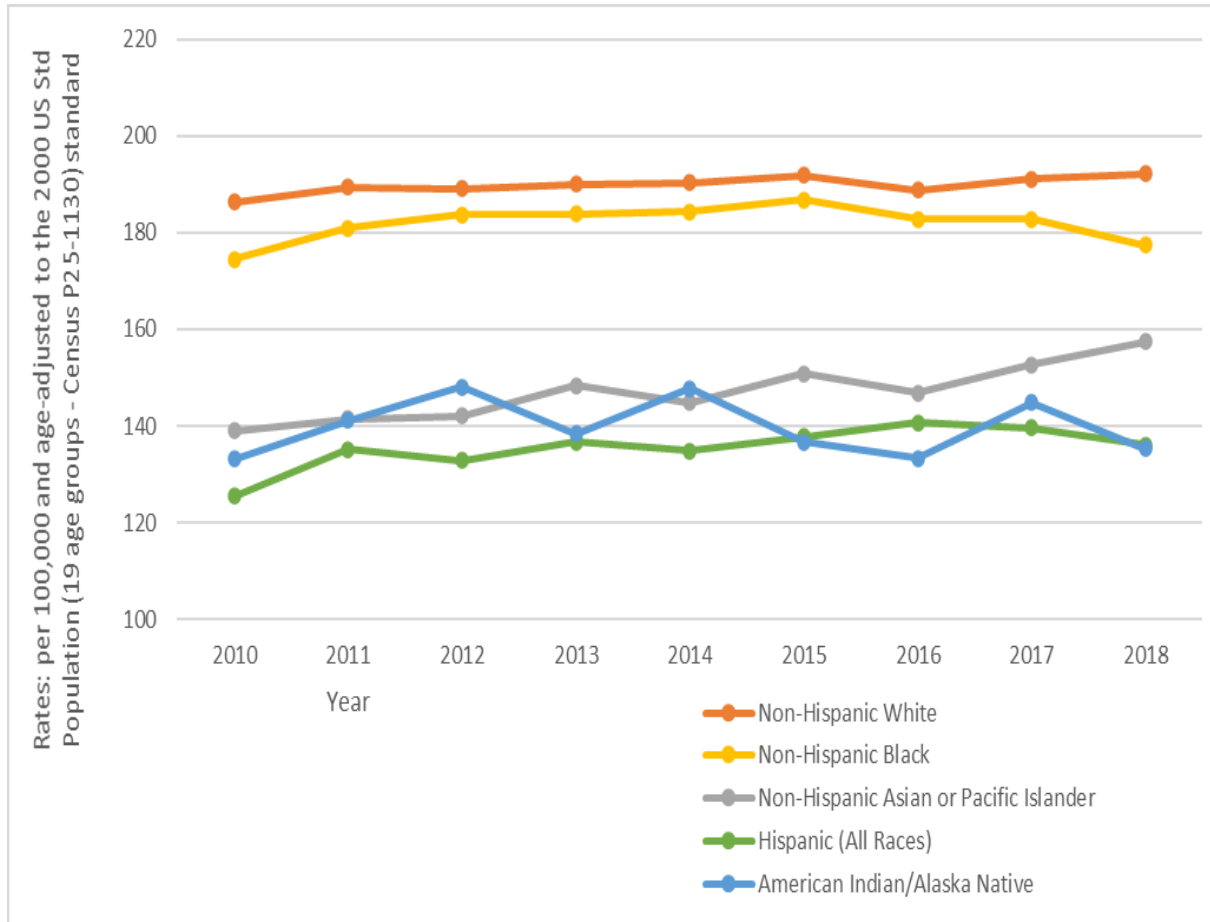

**Table S1. Annual percentage change (APC) in age-adjusted incidence rates\*  
(number of breast cancer cases per 100,000 population) in women in 2010-2018 by race/ethnicity**

| Race/Ethnicity                                   | 2010-2018     |          |                                     | APC (95% CI)     | P value |
|--------------------------------------------------|---------------|----------|-------------------------------------|------------------|---------|
|                                                  | N. Population | N. Cases | Incidence rate per 100,000 (95% CI) |                  |         |
| <b>Non-Hispanic Asians and Pacific Islanders</b> | 33,556,335    | 50,750   | 147.5 (146.2, 148.8)                | 1.4 (0.8, 1.9)   | < 0.05  |
| <b>Non-Hispanic white</b>                        | 169,706,160   | 393,951  | 189.9 (189.3, 190.6)                | 0.3 (0.1, 0.5)   | < 0.05  |
| <b>Non-Hispanic black</b>                        | 35,413,897    | 64,199   | 182.0 (180.6, 183.5)                | 0.1 (-0.5, 0.8)  | 0.6     |
| <b>American Indians and Alaska Natives</b>       | 2,392,756     | 3,314    | 139.3 (134.4, 144.2)                | -0.2 (-1.5, 1.2) | 0.8     |
| <b>Hispanics</b>                                 | 59,514,477    | 67,161   | 135.7 (134.7, 136.8)                | 0.8 (0.1, 1.6)   | < 0.05  |
| <b>Total</b>                                     | 300,583,625   | 583,001  | 177.6 (177.1, 178.1)                | 0.3 (0.1, 0.6)   | < 0.05  |

\*Incidence rates were age adjusted to the 2000 US population.
